# Supplementary material for: Ultrabright and biocompatible AIE dye based zwitterionic polymeric nanoparticles for biological imaging
Source: Royal Society of Chemistry journal article supplement (doi:10.1039/c4ra06160h), 2014-01-01
Supplement: c4ra06160h1.pdf [file c4ra06160h1.pdf]

## Supporting information

# Ultrabright and Biocompatible AIE Dye Based Zwitterionic Polymeric Nanoparticles for Biological Imaging

Meiying Liu<sup>a</sup>, Xiqi Zhang<sup>b</sup>, Bin Yang<sup>b</sup>, Fengjie Deng<sup>a</sup>, Zengfang huang<sup>b,c</sup>, Yang Yang<sup>b</sup>, Zhen Li<sup>b</sup>,  
Xiaoyong Zhang<sup>a,b,\*</sup>,Yen Wei<sup>b,\*</sup>

<sup>a</sup> Department of Chemistry/Institute of Polymers, Nanchang University, 999 Xuefu Avenue,  
Nanchang 330031, China. <sup>b</sup> Department of Chemistry and Key Laboratory of Bioorganic  
Phosphorus Chemistry & Chemical Biology (Ministry of Education), Tsinghua University, Beijing,  
100084, P. R. China. <sup>c</sup> College of Chemistry and Biology, Zhongshan Institute, University of  
ElectronicScience & Technology of China, Zhongshan 528402,China

[xiaoyongzhang1980@gmail.com](mailto:xiaoyongzhang1980@gmail.com); [weiyen@tsinghua.edu.cn](mailto:weiyen@tsinghua.edu.cn)

## Results

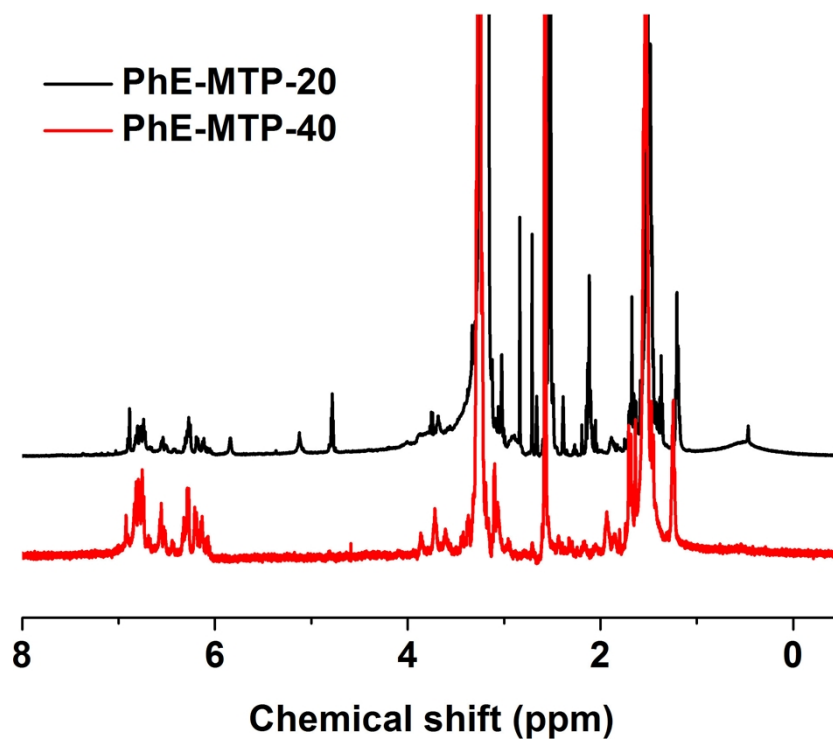

Fig. S1 <sup>1</sup>H NMR spectrum of PhE-MTP NPs dissolved in d<sub>6</sub>-DMSO

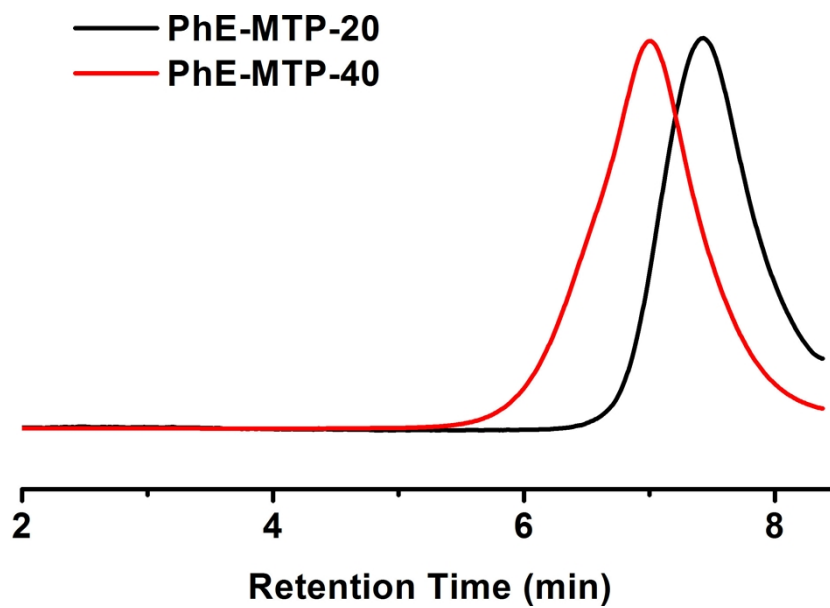

Fig. S2 GPC curves of PhE-MTP-20 and PhE-MTP-40.

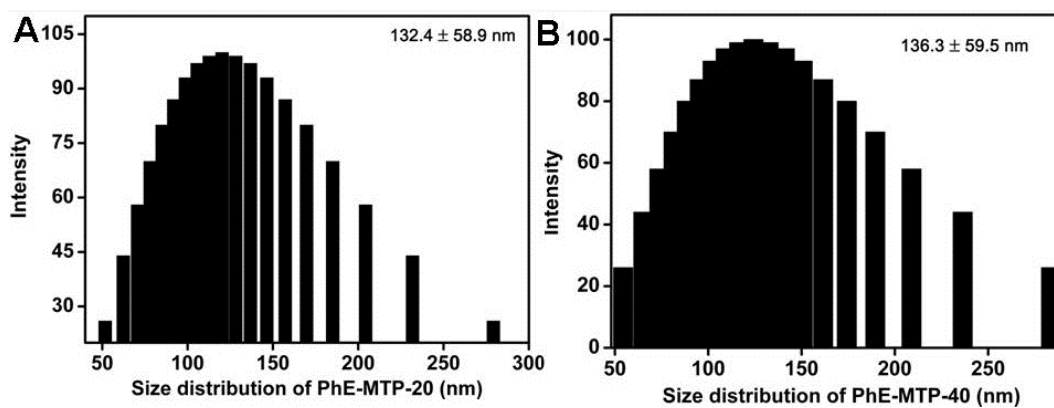

Fig. S3 hydrodynamic size distribution of PhE-MTP NPs in water, (A) PhE-MTP-20 NPs (B) PhE-MTP-40 NPs.

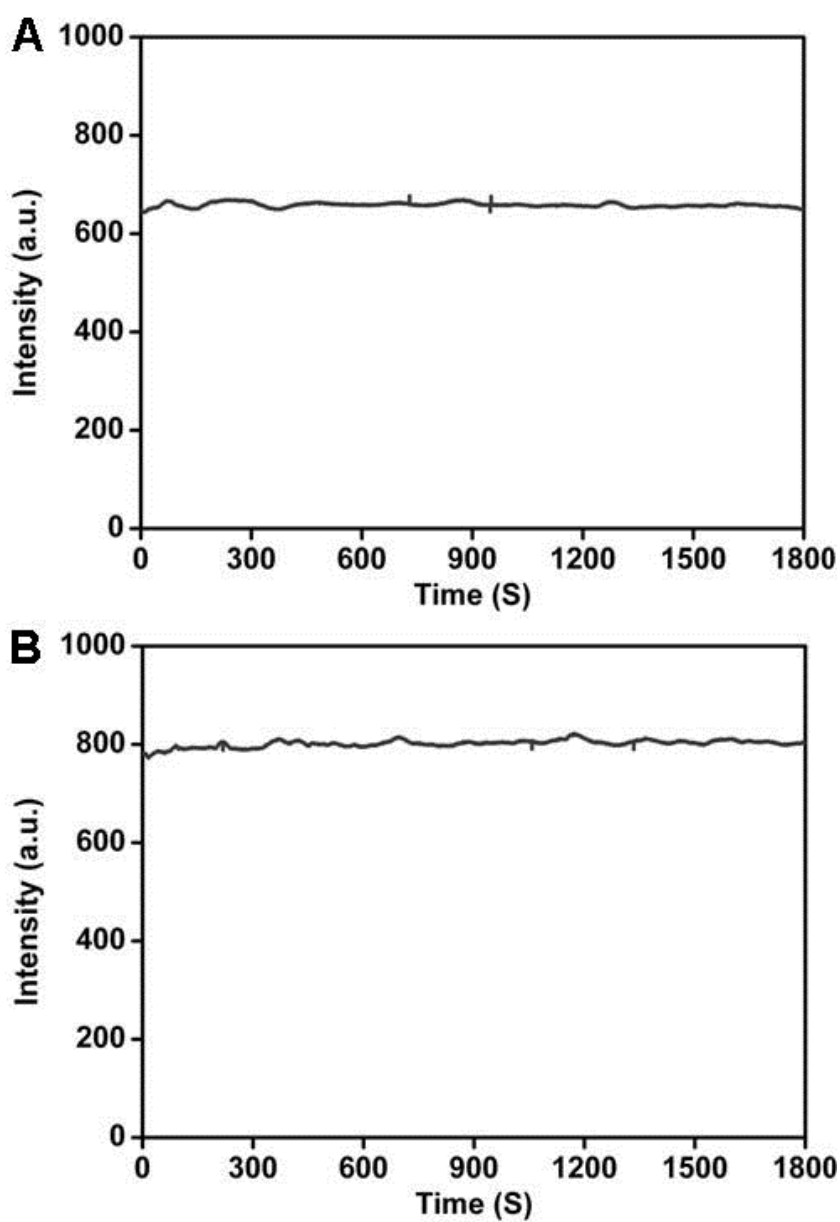

Fig. S4 Photostability of PhE-MTP NPs in water (excitation wavelength = 488 nm, emission

wavelength = 581 nm ).

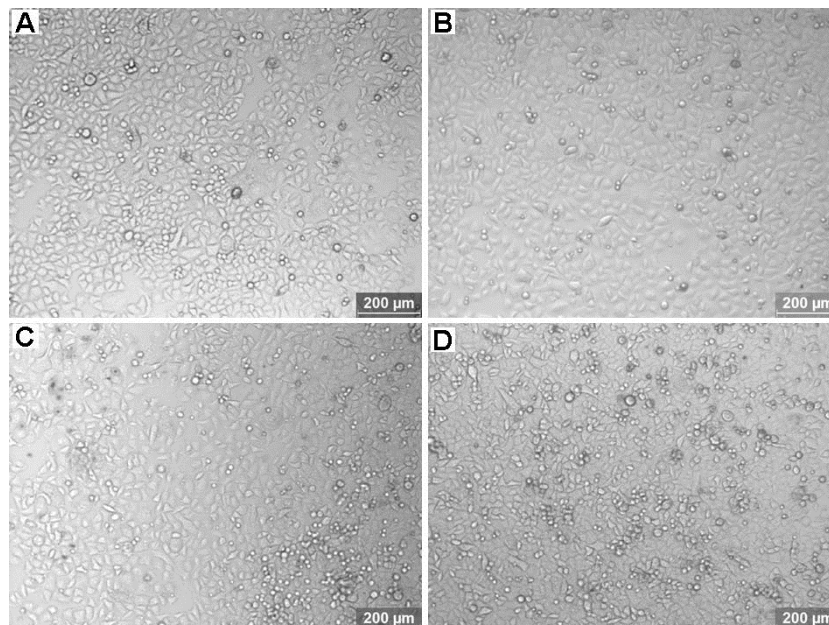

**Fig. S5** Microscopy observation of **PhE-MTP** NPs with A549 cells, the concentrations of **PhE-MTP** NPs are (A) control cells, (B) 20  $\mu\text{g mL}^{-1}$ , (C) 80  $\mu\text{g mL}^{-1}$  (D) 120  $\mu\text{g mL}^{-1}$ .

**Table S1** element contents (%) of MTP, **PhE-MTP** NPs based on XPS analysis

|                       | C     | N    | O     | P    |
|-----------------------|-------|------|-------|------|
| MTP                   | 59.48 | 4.34 | 31.2  | 4.98 |
| <b>PhE-MTP-20</b> NPs | 76.87 | 3.3  | 17.92 | 1.92 |
| <b>PhE-MTP-40</b> NPs | 76.78 | 2.86 | 18.89 | 1.47 |
